# Supplementary material for: Evaluation of Wheat Germplasm for Resistance to Leaf Rust (Puccinia triticina) and Identification of the Sources of Lr Resistance Genes Using Molecular Markers
Source: MDPI journal article supplement (doi:10.3390/plants10071484), 2021-07-20
Supplement: s1 [file s1]

**Table S1.** Seedlings reaction of Thatcher *Lr* genes isogenic lines to eight *Prt* pathotypes, Kazakhstan.

| Thatcher Near<br>Isogenic Line | Seedlings Reaction to Leaf Rust Pathotypes: |       |       |       |       |       |       |       |
|--------------------------------|---------------------------------------------|-------|-------|-------|-------|-------|-------|-------|
|                                | TKT/Q                                       | KHT/B | TGT/G | TLT/R | SBR/H | THT/B | QBQ/G | SBP/C |
| TcLr1                          | 4                                           | 2+    | 4     | 3+    | 3+    | 3+    | 3+    | 3+    |
| TcLr2a                         | 3+                                          | 3+    | 4     | 4     | 3+    | 3+    | 4     | 3+    |
| TcLr2c                         | 3                                           | 3+    | 3+    | 3+    | 3+    | 3+    | ;1-   | 3+    |
| TcLr3a                         | 3+                                          | 3     | 3+    | 3+    | 2+    | 3+    | 2+    | 2+    |
| TcLr3bg                        | 4                                           | 3     | 3+    | 3+    | 2+    | 3+    | 2+    | 2+    |
| TcLr3ka                        | 3                                           | 3+    | 3+    | 3+    | 3+    | 3+    | 3+    | 3+    |
| TcLr9                          | 0                                           | 0     | 0     | 3     | 0;    | 0     | 0;    | 0     |
| TcLr10                         | ;1                                          | 2+    | 3+    | 3+    | 2+    | ;1    | 0;    | ;1-   |
| TcLr11                         | 3+                                          | 3+    | 3     | 3     | 3+    | 3+    | 3+    | 2+    |
| TcLr14b                        | 3                                           | 2     | 3+    | 3+    | 2+    | 3+    | 3+    | 3+    |
| TcLr16                         | 4                                           | 3     | 3+    | ;1    | ;1-   | 3+    | ;1-   | ;1-   |
| TcLr17                         | 3+                                          | 3     | 3+    | 3+    | 2+    | 3     | 2+    | 3+    |
| TcLr18                         | 3                                           | 2     | 3+    | 3+    | 2     | 3+    | 2+    | ;1    |
| TcLr19                         | 3+                                          | 0     | 2     | 3     | 2     | ;1-   | 0     | 0     |
| TcLr20                         | 3+                                          | 2     | 3+    | 3+    | 3+    | ;1-   | 3+    | 2+    |
| TcLr21                         | 3+                                          | 2+    | 4     | 3+    | 2+    | 3+    | 0     | 0     |
| TcLr23                         | 3+                                          | ;1    | 2     | ;1    | 2+    | ;1-   | 0     | 2+    |
| TcLr24                         | 3+                                          | ;1-   | 0;    | ;     | 0     | 2+    | 0;    | 2+    |
| TcLr25                         | 0                                           | 0;    | 0     | 0     | 0;    | 0;    | 0;    | 0;    |
| TcLr26                         | 3+                                          | 3     | 2     | ;1-   | 2+    | 3+    | 2+    | 2+    |
| TcLr29                         | 2                                           | 2     | ;1-   | 3+    | 3+    | 2+    | 2+    | 3+    |
| TcLr30                         | 3+                                          | 3     | 3+    | 3+    | 3+    | 3+    | 2+    | 3+    |

**Table S2.** Markers and primers used to identify the presence of *Lr* genes in wheat germplasm.

| Gene        | Localization | Primer Name              | Primer Sequence (5'-3')                                                                              | Annealing<br>Temp. (°C) | Fragment Size (bp) | Reference |
|-------------|--------------|--------------------------|------------------------------------------------------------------------------------------------------|-------------------------|--------------------|-----------|
| <i>Lr1</i>  | 5DL          | pTAG 621-3<br>pTAG 621-5 | 5'-CCT TGC CAG CCC AAA AG-3'<br>5'-GGG TCA CGT ACT ACT ATA-3'                                        | 55                      | 560 bp             | [47]      |
| <i>Lr9</i>  | 6B           | J13/1<br>J13/2           | 5'-TCC TTT TAT TCC GCA CGC CGG-3'<br>5'-CCA CAC TAC CCC AAA GAG ACG-3'                               | 62                      | 1100 bp            | [48]      |
| <i>Lr10</i> | 1AS          | F1.2245<br>Lr10-6/r2     | 5'-GTG TAA TGC ATG CAG GTT CC-3'<br>5'-AGG TGT GAG TGA GTT ATG TT-3'                                 | 57                      | 310 bp             | [49]      |
| <i>Lr19</i> | 7A           | PSY1-EF2<br>PSY1-ER4     | 5'-CTA CGT TGC GGG CAC CGT T-3'<br>5'-AGA GAA AAC CAT TGC ATC TGT A-3'                               | 63                      | 191 bp             | [50]      |
| <i>Lr26</i> | 1BL          | SCM9                     | 5'-TGACAACCCCTTTCCCTCGT-3'<br>5'-TCATCGACGCTAAGGAGGACCC-3'                                           | 60                      | 207 bp             | [51]      |
| <i>Lr28</i> | 4AL          | Wmc313                   | 5'-GCA GTC TAA TTA TCT GCT GGC G-3'<br>5'-GGG TCC TTG TCT ACT CAT GTC C-3'                           | 51                      | 320 bp             | [52]      |
| <i>Lr34</i> | 7D           | csLV34-F<br>csLV34-R     | 5'-GTT GGT TAA GAC TGG TGA TGG-3'<br>5'-TGC TTG CTA TTG CTG AAT AGT-3'<br>5'-AGGGGCTACTGACCAAGGCT-3' | 55                      | 150 bp<br>229 bp   | [53]      |
| <i>Lr37</i> | 2AS          | Ventriup<br>Ln           | 5'-<br>TGCAGCTACAGCAGTATGTACACAAAA-<br>3'                                                            | 65                      | 262 bp             | [54]      |
| <i>Lr68</i> | 7BL          | csGS-F1<br>csGS-R1       | 5'-AAG ATT GTT CAC AGA TCC ATG TCA-<br>3'<br>5'-GAG TAT TCC GGC TCA AAA AGG-3'                       | 60                      | 385 bp             | [55]      |
